# Supplementary material
Source: PubMed Central journal article supplement (PMC8566316)
Supplement: NIHMS1711568-supplement-1711568_appendix.pdf [file NIHMS1711568-supplement-1711568_appendix.pdf]

**Journal:** The Patient

**Title:** Designing HIV testing and self-testing services for young people in Nigeria: A discrete choice experiment

Jason J. Ong PhD<sup>1-3</sup>, Ucheoma Nwaozuru PhD<sup>4</sup>, Chisom Obiezu-Umeh MPH<sup>4</sup>, Collins Airhihenbuwa PhD<sup>5</sup>, Hong Xian PhD<sup>4</sup>, Fern Terris-Prestholt PhD<sup>2</sup>, Titi Gbajabiamila MSc<sup>6</sup>, Adesola Z Musa PhD<sup>6</sup>, David Oladele MD<sup>6</sup>, Ifeoma Idigbe MA<sup>6</sup>, Agatha David MD<sup>6</sup>, Jane Okwuzu PhD<sup>6</sup>, Tajudeen Bamidele PhD<sup>6</sup>, Juliet Iwelunmor PhD<sup>4</sup>, Joseph D. Tucker PhD<sup>2,7</sup>, Oliver Ezechi PhD<sup>6</sup>

<sup>1</sup> Central Clinical School, Monash University, Melbourne, Australia

<sup>2</sup> London School of Hygiene and Tropical Medicine, London, United Kingdom

<sup>3</sup> Melbourne Sexual Health Centre, Alfred Health, Melbourne, Australia

<sup>4</sup> Saint Louis University College for Public Health and Social Justice, USA

<sup>5</sup> Georgia State University, Atlanta, USA

<sup>6</sup> The Nigerian Institute of Medical Research, Lagos Nigeria

<sup>7</sup> University of North Carolina at Chapel Hill, Chapel Hill, NC, USA.

§ **Corresponding author**

Jason Ong

580 Swanston Street

Carlton, Victoria 3053

Australia

Phone: +613 9341 6200

Email: [Jason.ong@monash.edu](mailto:Jason.ong@monash.edu) or [Jason.Ong@lshtm.ac.uk](mailto:Jason.Ong@lshtm.ac.uk)

## APPENDIX – Random parameters logit models with interactions

**Table S1 – Preferences for HIV testing using random parameters logit model with interactions of age (comparing those age 16-19 with 20-24 years) in Nigerian youth, 2019 (N=270)**

| Attribute                       | Coefficient | Standard deviation |
|---------------------------------|-------------|--------------------|
| <b>Cost</b>                     |             |                    |
| - No cost (reference)           | 0.71 ***    | 0.67 ***           |
| - 500 Naira (\$USD1.38)         | 0.11 **     | 0.19               |
| - 1000 Naira (\$USD2.76)        | -0.15 ***   | 0.36 ***           |
| - 2000 Naira (\$USD5.52)        | -0.67 ***   | 0.53 ***           |
| <b>Location</b>                 |             |                    |
| - Private hospital (reference)  | 0.08        | 0.52               |
| - Public/government hospital    | 0.14 *      | 0.01               |
| - Community health centres      | 0.13 *      | 0.01               |
| - Non-profit organizations      | -0.26 ***   | 0.03               |
| - Sexual health clinic          | -0.16 **    | 0.01               |
| - Awareness events              | 0.07        | 0.29               |
| - Pharmacy or chemist           | -0.21 **    | 0.17               |
| - Home (i.e. self testing)      | 0.21 **     | 0.40 **            |
| <b>Mode of testing</b>          |             |                    |
| - Venepuncture (reference)      | -0.18 ***   | 0.37 **            |
| - Blood from finger-prick       | 0.24 ***    | 0.13               |
| - Swab from mouth               | -0.06       | 0.35 ***           |
| <b>Person who conducts test</b> |             |                    |
| - Doctor (reference)            | 0.16 ***    | 0.51 **            |

|                                |       |      |     |
|--------------------------------|-------|------|-----|
| - Nurse                        | -0.07 | 0.03 |     |
| - Trained healthcare volunteer | -0.01 | 0.18 |     |
| - Yourself                     | -0.08 | 0.48 | *** |

Availability of HIV medicine

|                                        |       |     |      |     |
|----------------------------------------|-------|-----|------|-----|
| - Same location as testing (reference) | 0.19  | *** | 0.29 | *** |
| - Go to different location             | -0.19 | *** | 0.29 | *** |

Opt out

-1.56 \*\*\*

Interactions

|                                    |       |   |
|------------------------------------|-------|---|
| - Younger*Free                     | -0.04 |   |
| - Younger*500 Naira (\$USD1.38)    | -0.09 | * |
| - Younger*1000 Naira (\$USD2.76)   | 0.11  | * |
| - Younger*2000 Naira (\$USD5.52)   | 0.05  |   |
| - Younger*Home (i.e. self testing) | 0.09  |   |
| - Younger*Blood from finger-prick  | 0.02  |   |
| - Younger*Go to different location | <0.01 |   |
| - Younger*Opt-out                  | 0.08  |   |

---

\* p value <0.1, \*\* p value <0.05, \*\*\* p value <0.01, AIC/N = 1.708

**Table S2 – Preferences for HIV testing using random parameters logit model with interactions of gender (comparing males with females) in Nigerian youth, 2019 (N=270)**

| Attribute                       | Coefficient | Standard deviation |
|---------------------------------|-------------|--------------------|
| <b>Cost</b>                     |             |                    |
| - No cost (reference)           | 0.73 ***    | 0.67 ***           |
| - 500 Naira (\$USD1.38)         | 0.13 ***    | 0.20               |
| - 1000 Naira (\$USD2.76)        | -0.20 ***   | 0.38 ***           |
| - 2000 Naira (\$USD5.52)        | -0.66 ***   | 0.52 ***           |
| <b>Location</b>                 |             |                    |
| - Private hospital (reference)  | 0.10        | 0.53               |
| - Public/government hospital    | 0.14 *      | 0.01               |
| - Community health centres      | 0.13        | <0.01              |
| - Non-profit organizations      | -0.26 ***   | 0.03               |
| - Sexual health clinic          | -0.16 **    | <0.01              |
| - Awareness events              | 0.07        | 0.31               |
| - Pharmacy or chemist           | -0.20 **    | 0.17               |
| - Home (i.e. self testing)      | 0.18 **     | 0.39 **            |
| <b>Mode of testing</b>          |             |                    |
| - Venepuncture (reference)      | -0.17 ***   | 0.37 **            |
| - Blood from finger-prick       | 0.23 ***    | 0.13               |
| - Swab from mouth               | -0.06       | 0.35 ***           |
| <b>Person who conducts test</b> |             |                    |
| - Doctor (reference)            | 0.17 ***    | 0.52 **            |
| - Nurse                         | -0.08       | 0.03               |

|                                |       |      |     |
|--------------------------------|-------|------|-----|
| - Trained healthcare volunteer | -0.01 | 0.18 |     |
| - Yourself                     | -0.08 | 0.49 | *** |

Availability of HIV medicine

|                                        |       |     |      |     |
|----------------------------------------|-------|-----|------|-----|
| - Same location as testing (reference) | 0.19  | *** | 0.29 | *** |
| - Go to different location             | -0.19 | *** | 0.29 | *** |

Opt out

-1.58 \*\*\*

Interactions

|                                 |       |    |
|---------------------------------|-------|----|
| - Men*Free                      | -0.04 |    |
| - Men *500 Naira (\$USD1.38)    | -0.11 | ** |
| - Men *1000 Naira (\$USD2.76)   | 0.02  |    |
| - Men *2000 Naira (\$USD5.52)   | 0.13  | ** |
| - Men *Home (i.e. self testing) | 0.04  |    |
| - Men *Blood from finger-prick  | -0.01 |    |
| - Men *Go to different location | 0.02  |    |
| - Men *Opt-out                  | 0.11  |    |

---

\* p value <0.1, \*\* p value <0.05, \*\*\* p value <0.01, AIC/N = 1.708

**Table S3 – Preferences for HIV testing using random parameters logit model with interactions of education level (comparing those with higher than secondary education level with those with secondary education or lower) in Nigerian youth, 2019 (N=270)**

| Attribute                       | Coefficient | Standard deviation |
|---------------------------------|-------------|--------------------|
| <b>Cost</b>                     |             |                    |
| - No cost (reference)           | 0.68 ***    | 0.67 ***           |
| - 500 Naira (\$USD1.38)         | 0.16 ***    | 0.22 **            |
| - 1000 Naira (\$USD2.76)        | -0.21 ***   | 0.38 ***           |
| - 2000 Naira (\$USD5.52)        | -0.63 ***   | 0.50 ***           |
| <b>Location</b>                 |             |                    |
| - Private hospital (reference)  | 0.16 *      | 0.54               |
| - Public/government hospital    | 0.15        | 0.01               |
| - Community health centres      | 0.12        | 0.02               |
| - Non-profit organizations      | -0.26 ***   | 0.03               |
| - Sexual health clinic          | -0.16 **    | 0.01               |
| - Awareness events              | 0.08        | 0.31               |
| - Pharmacy or chemist           | -0.21 **    | 0.16               |
| - Home (i.e. self testing)      | 0.12        | 0.41               |
| <b>Mode of testing</b>          |             |                    |
| - Venepuncture (reference)      | -0.16 ***   | 0.37 **            |
| - Blood from finger-prick       | 0.22 ***    | 0.14               |
| - Swab from mouth               | -0.06       | 0.34 ***           |
| <b>Person who conducts test</b> |             |                    |
| - Doctor (reference)            | 0.17 **     | 0.51 **            |
| - Nurse                         | -0.09 *     | <0.01              |

|                                        |        |      |          |
|----------------------------------------|--------|------|----------|
| - Trained healthcare volunteer         | <-0.01 | 0.21 | **       |
| - Yourself                             | -0.08  | 0.47 | ***      |
| Availability of HIV medicine           |        |      |          |
| - Same location as testing (reference) | 0.18   | ***  | 0.30 *** |
| - Go to different location             | -0.18  | ***  | 0.30 *** |
| Opt out                                | -1.66  | ***  |          |
| Interactions                           |        |      |          |
| - Secondary*Free                       | 0.17   |      |          |
| - Secondary*500 Naira (\$USD1.38)      | -0.01  |      |          |
| - Secondary*1000 Naira (\$USD2.76)     | 0.01   |      |          |
| - Secondary*2000 Naira (\$USD5.52)     | -0.17  | ***  |          |
| - Secondary*Home (i.e. self testing)   | 0.14   | *    |          |
| - Secondary*Blood from finger-prick    | 0.03   |      |          |
| - Secondary*Go to different location   | -0.01  |      |          |
| - Secondary*Opt-out                    | 0.16   | **   |          |

---

\* p value <0.1, \*\* p value <0.05, \*\*\* p value <0.01, AIC/N = 1.706

**Table S4 – Preferences for HIV testing using random parameters logit model with interactions of sexual behaviour (comparing those who ever had sex with those who never had sex) in Nigerian youth, 2019 (N=270)**

| Attribute                       | Coefficient | Standard deviation |
|---------------------------------|-------------|--------------------|
| <b>Cost</b>                     |             |                    |
| - No cost (reference)           | 0.65 ***    | 0.69 ***           |
| - 500 Naira (\$USD1.38)         | 0.14        | 0.24 **            |
| - 1000 Naira (\$USD2.76)        | -0.13       | 0.37 ***           |
| - 2000 Naira (\$USD5.52)        | -0.66 ***   | 0.53 ***           |
| <b>Location</b>                 |             |                    |
| - Private hospital (reference)  | 0.07        | 0.55               |
| - Public/government hospital    | 0.14        | 0.06               |
| - Community health centres      | 0.13        | 0.01               |
| - Non-profit organizations      | -0.27 ***   | 0.06               |
| - Sexual health clinic          | -0.16 **    | 0.09               |
| - Awareness events              | 0.08        | 0.37 **            |
| - Pharmacy or chemist           | -0.21 **    | 0.13               |
| - Home (i.e. self testing)      | 0.22        | 0.37 **            |
| <b>Mode of testing</b>          |             |                    |
| - Venepuncture (reference)      | -0.28 **    | 0.37 **            |
| - Blood from finger-prick       | 0.34 ***    | 0.14               |
| - Swab from mouth               | -0.06       | 0.34 ***           |
| <b>Person who conducts test</b> |             |                    |
| - Doctor (reference)            | 0.17 **     | 0.51 **            |
| - Nurse                         | -0.08       | 0.02               |



|                                |        |      |     |
|--------------------------------|--------|------|-----|
| - Trained healthcare volunteer | <-0.01 | 0.20 | **  |
| - Yourself                     | -0.09  | 0.47 | *** |

Availability of HIV medicine

|                                        |       |     |      |     |
|----------------------------------------|-------|-----|------|-----|
| - Same location as testing (reference) | 0.16  | *** | 0.29 | *** |
| - Go to different location             | -0.16 | *** | 0.29 | *** |

Opt out

-1.40 \*\*\*

Interactions

|                                |       |    |  |
|--------------------------------|-------|----|--|
| - Sex*Free                     | -0.13 |    |  |
| - Sex*500 Naira (\$USD1.38)    | -0.01 |    |  |
| - Sex*1000 Naira (\$USD2.76)   | 0.09  |    |  |
| - Sex*2000 Naira (\$USD5.52)   | 0.05  |    |  |
| - Sex*Home (i.e. self testing) | 0.06  |    |  |
| - Sex*Blood from finger-prick  | 0.12  | *  |  |
| - Sex*Go to different location | 0.04  |    |  |
| - Sex*Opt-out                  | 0.23  | ** |  |

---

\* p value <0.1, \*\* p value <0.05, \*\*\* p value <0.01, AIC/N = 1.708

**Table S5 – Preferences for HIV testing using random parameters logit model with interactions of HIV testing behaviour (comparing those who ever tested with those who never tested) in Nigerian youth, 2019 (N=270)**

| Attribute                       | Coefficient | Standard deviation |
|---------------------------------|-------------|--------------------|
| <b>Cost</b>                     |             |                    |
| - No cost (reference)           | 0.75 ***    | 0.70 ***           |
| - 500 Naira (\$USD1.38)         | 0.16 ***    | 0.26 **            |
| - 1000 Naira (\$USD2.76)        | -0.20 ***   | 0.37 ***           |
| - 2000 Naira (\$USD5.52)        | -0.71 ***   | 0.54 ***           |
| <b>Location</b>                 |             |                    |
| - Private hospital (reference)  | 0.12        | 0.57               |
| - Public/government hospital    | 0.14 *      | <0.01              |
| - Community health centres      | 0.13        | 0.03               |
| - Non-profit organizations      | -0.26 ***   | 0.02               |
| - Sexual health clinic          | -0.17 **    | 0.07               |
| - Awareness events              | 0.07        | 0.38 **            |
| - Pharmacy or chemist           | -0.21 **    | 0.26               |
| - Home (i.e. self testing)      | 0.18 **     | 0.33 *             |
| <b>Mode of testing</b>          |             |                    |
| - Venepuncture (reference)      | -0.18 ***   | 0.37 **            |
| - Blood from finger-prick       | 0.24 ***    | 0.15               |
| - Swab from mouth               | -0.06       | 0.34 ***           |
| <b>Person who conducts test</b> |             |                    |
| - Doctor (reference)            | 0.18 ***    | 0.53 **            |

|                                |       |      |     |
|--------------------------------|-------|------|-----|
| - Nurse                        | -0.08 | 0.05 |     |
| - Trained healthcare volunteer | -0.01 | 0.16 |     |
| - Yourself                     | -0.09 | 0.50 | *** |

#### Availability of HIV medicine

|                                        |       |     |      |     |
|----------------------------------------|-------|-----|------|-----|
| - Same location as testing (reference) | 0.19  | *** | 0.30 | *** |
| - Go to different location             | -0.19 | *** | 0.30 | *** |

#### Opt out

-1.59 \*\*\*

#### Interactions

|                                           |       |   |  |
|-------------------------------------------|-------|---|--|
| - Previous test*Free                      | 0.01  |   |  |
| - Previous test *500 Naira (\$USD1.38)    | 0.01  |   |  |
| - Previous test *1000 Naira (\$USD2.76)   | 0.02  |   |  |
| - Previous test *2000 Naira (\$USD5.52)   | -0.04 |   |  |
| - Previous test *Home (i.e. self testing) | 0.08  |   |  |
| - Previous test *Blood from finger-prick  | 0.07  | * |  |
| - Previous test*Go to different location  | -0.02 |   |  |
| - Previous test*Opt out                   | -0.03 |   |  |

---

\* p value <0.1, \*\* p value <0.05, \*\*\* p value <0.01, AIC/N = 1.708

**Table S6 – Preferences for using a HIV self-test kit using random parameters logit model with interactions of age (comparing those age 16-19 with 20-24 years) in Nigerian youth, 2019 (N=234)**

| Attribute                                                     | Coefficient | Standard deviation |
|---------------------------------------------------------------|-------------|--------------------|
| <b>Cost</b>                                                   |             |                    |
| - No cost (reference)                                         | 0.30        | 0.47               |
| - 500 Naira (\$USD1.38)                                       | 0.25 *      | 0.02               |
| - 1000 Naira (\$USD2.76)                                      | -0.02       | 0.02               |
| - 2000 Naira (\$USD5.52)                                      | -0.53 ***   | 0.47 ***           |
| <b>Test quality</b>                                           |             |                    |
| - Not approved by WHO (ref)                                   | -0.36 ***   | 0.38 ***           |
| - Approved by WHO                                             | 0.36 ***    | 0.38 ***           |
| <b>Type of test</b>                                           |             |                    |
| - Blood from finger-prick (ref)                               | -0.11 ***   | <0.01              |
| - Swab from mouth                                             | 0.11 **     | <0.01              |
| <b>Extra items in kit</b>                                     |             |                    |
| - Test for other STIs (syphilis/chlam/gono)                   | 0.35 ***    | 0.20               |
| - Pregnancy test, condoms, and/or contraceptive pill          | 0.12        | <0.01              |
| - Information about safe sex, HIV and other STIs              | -0.31 ***   | 0.20               |
| - Malaria or TB test                                          | -0.16       | 0.01               |
| <b>Support if test positive</b>                               |             |                    |
| - Flyer with list of HIV clinics (ref)                        | -0.25 ***   | 0.25               |
| - Online chat with trained counsellors or youth health worker | 0.28 **     | <0.01              |

|                                                                                  |       |       |
|----------------------------------------------------------------------------------|-------|-------|
| - Same-day in-person consultation with trained counsellor or youth health worker | 0.12  | 0.25  |
| - Same-day in-person consultation with doctor                                    | -0.15 | <0.01 |

#### Location

|                                      |           |      |
|--------------------------------------|-----------|------|
| - Private hospital (ref)             | -0.22 *   | 0.29 |
| - Public/government hospital         | 0.35      | 0.09 |
| - Community health centres           | 0.39 ***  | 0.25 |
| - Non-profit organizations           | -0.48 *** | 0.07 |
| - Sexual health clinic               | 0.28      | 0.08 |
| - Awareness events                   | 0.11      | 0.01 |
| - Pharmacy or chemist                | -0.29 *   | 0.02 |
| - Online ordering with home delivery | -0.14     | 0.02 |

#### Opt out

-1.77 \*\*\*

#### Interactions

|                                                   |       |
|---------------------------------------------------|-------|
| - Young*2000 Naira (\$USD5.52)                    | -0.02 |
| - Young*Approved by WHO (ref)                     | -0.01 |
| - Young*Information about safe sex, HIV and other | -0.05 |

#### STIs

|                 |      |
|-----------------|------|
| - Young*Opt-out | 0.10 |
|-----------------|------|

---

\* p value <0.1, \*\* p value <0.05, \*\*\* p value <0.01, AIC/N = 1.683

**Table S7 – Preferences for using a HIV self-test kit using random parameters logit model with interactions of gender (comparing males with females) in Nigerian youth, 2019 (N=234)**

| Attribute                                                     | Coefficient | Standard deviation |
|---------------------------------------------------------------|-------------|--------------------|
| <b>Cost</b>                                                   |             |                    |
| - No cost (reference)                                         | 0.30 *      | 0.47               |
| - 500 Naira (\$USD1.38)                                       | 0.25 *      | 0.01               |
| - 1000 Naira (\$USD2.76)                                      | -0.02       | 0.04               |
| - 2000 Naira (\$USD5.52)                                      | -0.53 ***   | 0.47 ***           |
| <b>Test quality</b>                                           |             |                    |
| - Not approved by WHO (ref)                                   | -0.38 ***   | 0.38 ***           |
| - Approved by WHO                                             | 0.38 ***    | 0.38 ***           |
| <b>Type of test</b>                                           |             |                    |
| - Blood from finger-prick (ref)                               | -0.11 *     | <0.01              |
| - Swab from mouth                                             | 0.11 *      | <0.01              |
| <b>Extra items in kit</b>                                     |             |                    |
| - Test for other STIs (syphilis/chlam/gono)                   | 0.31 ***    | 0.21               |
| - Pregnancy test, condoms, and/or contraceptive pill          | 0.12        | <0.01              |
| - Information about safe sex, HIV and other STIs              | -0.27 ***   | 0.21               |
| - Malaria or TB test                                          | -0.16       | <0.01              |
| <b>Support if test positive</b>                               |             |                    |
| - Flyer with list of HIV clinics (ref)                        | -0.25 ***   | 0.18               |
| - Online chat with trained counsellors or youth health worker | 0.28 **     | 0.01               |

- Same-day in-person consultation with trained counsellor or youth health worker 0.11 0.18
- Same-day in-person consultation with doctor -0.14 <0.01

#### Location

- Private hospital (ref) -0.22 0.30
- Public/government hospital 0.37 0.10
- Community health centres 0.38 \*\*\* 0.25
- Non-profit organizations -0.48 \*\*\* 0.07
- Sexual health clinic 0.28 0.10
- Awareness events 0.11 0.01
- Pharmacy or chemist -0.30 \* 0.03
- Online ordering with home delivery -0.14 0.03

#### Opt out

-1.79 \*\*\*

#### Interactions

- Male\*2000 Naira (\$USD5.52) -0.05
- Male\*Approved by WHO 0.04
- Male\*Information about safe sex, HIV and other STIs 0.01
- Male\*Opt-out 0.41 \*\*\*

---

\* p value <0.1, \*\* p value <0.05, \*\*\* p value <0.01, AIC/N = 1.671

**Table S8 – Preferences for using a HIV self-test kit using random parameters logit model with interactions of education level (comparing those who had higher than secondary education with those who had secondary education or lower) in Nigerian youth, 2019 (N=234)**

| Attribute                                            | Coefficient | Standard deviation |
|------------------------------------------------------|-------------|--------------------|
| <b>Cost</b>                                          |             |                    |
| - No cost (reference)                                | 0.30 ***    | 0.47               |
| - 500 Naira (\$USD1.38)                              | 0.26 **     | 0.03               |
| - 1000 Naira (\$USD2.76)                             | -0.03       | 0.03               |
| - 2000 Naira (\$USD5.52)                             | -0.53 ***   | 0.47 ***           |
| <b>Test quality</b>                                  |             |                    |
| - Not approved by WHO (ref)                          | -0.37 ***   | 0.38 ***           |
| - Approved by WHO                                    | 0.37 ***    | 0.38 ***           |
| <b>Type of test</b>                                  |             |                    |
| - Blood from finger-prick (ref)                      | -0.11 **    | 0.01               |
| - Swab from mouth                                    | 0.11 **     | 0.01               |
| <b>Extra items in kit</b>                            |             |                    |
| - Test for other STIs (syphilis/chlam/gono)          | 0.32 ***    | 0.21               |
| - Pregnancy test, condoms, and/or contraceptive pill | 0.12        | 0.01               |
| - Information about safe sex, HIV and other STIs     | -0.28 ***   | 0.21 *             |
| - Malaria or TB test                                 | -0.16       | 0.01               |
| <b>Support if test positive</b>                      |             |                    |
| - Flyer with list of HIV clinics (ref)               | -0.26 ***   | 0.20               |



|                                                                                  |         |        |
|----------------------------------------------------------------------------------|---------|--------|
| - Online chat with trained counsellors or youth health worker                    | 0.28 ** | 0.02   |
| - Same-day in-person consultation with trained counsellor or youth health worker | 0.13    | 0.20 * |
| - Same-day in-person consultation with doctor                                    | -0.15   | 0.01   |

#### Location

|                                      |           |      |
|--------------------------------------|-----------|------|
| - Private hospital (ref)             | -0.19     | 0.32 |
| - Public/government hospital         | 0.35      | 0.18 |
| - Community health centres           | 0.38 ***  | 0.24 |
| - Non-profit organizations           | -0.48 *** | 0.07 |
| - Sexual health clinic               | 0.27      | 0.09 |
| - Awareness events                   | 0.12      | 0.01 |
| - Pharmacy or chemist                | -0.31 *   | 0.04 |
| - Online ordering with home delivery | -0.14     | 0.02 |

Opt out -1.84 \*\*\*

#### Interactions

|                                                            |       |
|------------------------------------------------------------|-------|
| - Secondary*2000 Naira (\$USD5.52)                         | 0.02  |
| - Secondary*Approved by WHO                                | -0.04 |
| - Secondary*Information about safe sex, HIV and other STIs | -0.02 |
| - Secondary*Opt-out                                        | 0.07  |

---

\* p value <0.1, \*\* p value <0.05, \*\*\* p value <0.01, AIC/N = 1.682

**Table S9 – Preferences for using a HIV self-test kit using random parameters logit model with interactions of sexual behaviour (comparing those who ever had sex with those never had sex) in Nigerian youth, 2019 (N=234)**

| Attribute                                                     | Coefficient | Standard deviation |
|---------------------------------------------------------------|-------------|--------------------|
| <b>Cost</b>                                                   |             |                    |
| - No cost (reference)                                         | 0.24 ***    | 0.47               |
| - 500 Naira (\$USD1.38)                                       | 0.25 *      | 0.02               |
| - 1000 Naira (\$USD2.76)                                      | -0.02       | 0.01               |
| - 2000 Naira (\$USD5.52)                                      | -0.47 ***   | 0.47 ***           |
| <b>Test quality</b>                                           |             |                    |
| - Not approved by WHO (ref)                                   | -0.41 ***   | 0.38 ***           |
| - Approved by WHO                                             | 0.41 ***    | 0.38 ***           |
| <b>Type of test</b>                                           |             |                    |
| - Blood from finger-prick (ref)                               | -0.11 ***   | <0.01              |
| - Swab from mouth                                             | 0.11 **     | <0.01              |
| <b>Extra items in kit</b>                                     |             |                    |
| - Test for other STIs (syphilis/chlam/gono)                   | 0.28 ***    | 0.21               |
| - Pregnancy test, condoms, and/or contraceptive pill          | 0.12        | <0.01              |
| - Information about safe sex, HIV and other STIs              | -0.24 **    | 0.21               |
| - Malaria or TB test                                          | -0.16       | <0.01              |
| <b>Support if test positive</b>                               |             |                    |
| - Flyer with list of HIV clinics (ref)                        | -0.25 ***   | 0.19               |
| - Online chat with trained counsellors or youth health worker | 0.28 **     | <0.01              |

|                                                                                  |       |     |       |
|----------------------------------------------------------------------------------|-------|-----|-------|
| - Same-day in-person consultation with trained counsellor or youth health worker | 0.12  |     | 0.19  |
| - Same-day in-person consultation with doctor                                    | -0.15 |     | <0.01 |
| <b>Location</b>                                                                  |       |     |       |
| - Private hospital (ref)                                                         | -0.23 |     | 0.30  |
| - Public/government hospital                                                     | 0.37  |     | 0.10  |
| - Community health centres                                                       | 0.39  | *** | 0.26  |
| - Non-profit organizations                                                       | -0.48 | *** | 0.07  |
| - Sexual health clinic                                                           | 0.28  |     | 0.09  |
| - Awareness events                                                               | 0.11  |     | 0.01  |
| - Pharmacy or chemist                                                            | -0.30 | *   | 0.02  |
| - Online ordering with home delivery                                             | -0.14 |     | 0.02  |
| <b>Opt out</b>                                                                   | -1.79 | *** |       |
| <b>Interactions</b>                                                              |       |     |       |
| - Sex*2000 Naira (\$USD5.52)                                                     | 0.05  |     |       |
| - Sex*Approved by WHO                                                            | 0.06  |     |       |
| - Sex*Information about safe sex, HIV and other STIs                             | 0.04  |     |       |
| - Sex*Opt-out                                                                    | -0.30 | *** |       |

---

\* p value <0.1, \*\* p value <0.05, \*\*\* p value <0.01, AIC/N = 1.677

**Table S10 – Preferences for using a HIV self-test kit using random parameters logit model with interactions of HIV testing behaviour (comparing those who ever tested with those who never tested) in Nigerian youth, 2019 (N=234)**

| Attribute                                                     | Coefficient | Standard deviation |
|---------------------------------------------------------------|-------------|--------------------|
| <b>Cost</b>                                                   |             |                    |
| - No cost (reference)                                         | 0.29 **     | 0.47               |
| - 500 Naira (\$USD1.38)                                       | 0.26 **     | 0.01               |
| - 1000 Naira (\$USD2.76)                                      | -0.03       | 0.01               |
| - 2000 Naira (\$USD5.52)                                      | -0.52 ***   | 0.47 ***           |
| <b>Test quality</b>                                           |             |                    |
| - Not approved by WHO (ref)                                   | -0.34 ***   | 0.37 ***           |
| - Approved by WHO                                             | 0.34 ***    | 0.37 ***           |
| <b>Type of test</b>                                           |             |                    |
| - Blood from finger-prick (ref)                               | -0.11 **    | 0.01               |
| - Swab from mouth                                             | 0.11 **     | 0.01               |
| <b>Extra items in kit</b>                                     |             |                    |
| - Test for other STIs (syphilis/chlam/gono)                   | 0.33 ***    | 0.19               |
| - Pregnancy test, condoms, and/or contraceptive pill          | 0.12        | <0.01              |
| - Information about safe sex, HIV and other STIs              | -0.29 ***   | 0.19               |
| - Malaria or TB test                                          | -0.16       | <0.01              |
| <b>Support if test positive</b>                               |             |                    |
| - Flyer with list of HIV clinics (ref)                        | -0.25 ***   | 0.18               |
| - Online chat with trained counsellors or youth health worker | 0.27 **     | 0.01               |

- Same-day in-person consultation with trained counsellor or youth health worker 0.12 0.18
- Same-day in-person consultation with doctor -0.14 <0.01

#### Location

- Private hospital (ref) -0.20 0.31
- Public/government hospital 0.33 0.08
- Community health centres 0.39 \*\*\* 0.28 \*
- Non-profit organizations -0.47 \*\*\* 0.06
- Sexual health clinic 0.27 0.10
- Awareness events 0.11 <0.01
- Pharmacy or chemist -0.30 \* 0.01
- Online ordering with home delivery -0.13 0.02

#### Opt out

-1.81 \*\*\*

#### Interactions

- Tested \*2000 Naira (\$USD5.52) -0.04
- Tested \*Approved by WHO 0.07
- Tested \*Information about safe sex, HIV and other STIs 0.05

#### STIs

- Tested\*Opt-out -0.27 \*\*\*

---

\* p value <0.1, \*\* p value <0.05, \*\*\* p value <0.01, AIC/N = 1.699

## Survey

**This survey is for young people (between age 14 and 24) in Nigeria who are not living with HIV.**

Saint Louis University (SLU), University of North Carolina at Chapel Hill (UNC), New York University (NYU) and the Nigerian Institute of Medical Research (NIMR) are conducting this survey to understand YOUR thoughts about HIV self-testing.

The study is important because:

- The rate of new HIV infection is high among young people
- Some of the young people in Nigeria have still not tested for HIV
- HIV-self testing could help increase the number of times young people get tested and will help them to know their status or detect the infection at an early stage so that effective treatment can be started

Young people deserve a strong voice in how self-testing works. Your participation in this study will help inform future HIV self-testing programs.

Your participation in this survey is completely **voluntary** and **anonymous**. Any information we collect will remain completely confidential.

Please complete this survey only once. The survey takes approximately 30-40 minutes to complete. Please allow sufficient time to finish the survey before you start. If you get interrupted, your answers are automatically saved and you can complete the remaining questions by using the original link sent to you. Please complete this within the same day. You can use your smartphone to complete the survey although a desktop/laptop/tablet computer is recommended.

If you have questions or concerns about the survey, you may contact Dr. Oliver Ezechi at [oliverezechi@yahoo.co.uk](mailto:oliverezechi@yahoo.co.uk)

A1) If you would like to proceed to the survey, please select “Agree” below indicating that you consent to participate. Your participation is very valuable!

- Agree
- Disagree

B1) How old are you? \_\_\_\_\_ years

B2) Are you living with HIV?

- Yes
- No

B3) Have you completed this survey before?

- Yes
- No

B4) How did you hear about the survey? (check all that apply)

- Friend
- Co-worker
- Flyer

- Other: Please describe\_\_\_\_\_

B5) Which social media options are you using? (check all that apply)

- Facebook
- Instagram
- WhatsApp
- Twitter
- None
- All of the above
- Other: Please describe\_\_\_\_\_

C1) What gender are you?

- Male
- Female
- Other, please specify:\_\_\_\_\_

C2) What is your ethnic background?

- Igbo
- Yoruba
- Hausa
- Other, Please specify:\_\_\_\_\_

C3) Where were you born?

- Nigeria
- Other country, please specify:

C4) In what year did you first come to live in Nigeria? \_\_\_\_\_

C5) What is the highest level of education you have completed?

- No education
- Primary education
- Secondary education
- Polytechnic
- National Certificate of Education
- Tertiary education
- Other, please specify:

C6) What is your current employment status?

- Student
- Employed full time
- Employed part time
- Self-employed
- Unemployed
- Other, please specify:

C7) Where do you currently reside (specify Local government area)?

---

C8) What is your current marital status?

- Never married or single
- Unmarried couple living together
- Engaged or married

- Divorced or separated
- Widowed

C9) Who do you live with?

- With my spouse (husband/wife) and/or children
- With my parents
- With relatives other than my parents
- With boyfriend or girlfriend
- With friends
- By myself
- Other, please specify:

C10) What is your father's occupation?

- Unemployed
- Trading/business
- Services (i.e. tailors, hairdressers)
- Civil servant
- Administration/Management/clerical
- Professional/Teachers
- Agriculture
- Unskilled manual
- Retired
- Student
- I don't know
- Other, please specify:

C11) What is your mother's occupation?

- Unemployed
- Trading/business
- Services (i.e. tailors, hairdressers)
- Civil servant
- Administration/Management/clerical
- Professional/Teachers
- Agriculture
- Unskilled manual
- Retired
- Student
- I don't know
- Other, please specify



### How you prefer to be tested for HIV

As a Nigerian youth, we would like to know YOUR preferences when it comes to HIV testing. You will now be presented with 12 different set of options for you to choose from that are related to HIV testing. It is important for you to answer all the questions as different versions of your options will be presented. Please consider all characteristics for each choice before you choose. Your choices matter and will help us to provide the right program for young people in Nigeria.

Imagine you want to test for HIV. Given that you are only allowed to choose one of the three options below, which one of the options would you prefer for HIV testing?

#### Choice 1

|                                      | Option 1                     | Option 2                             | Option 3                                     |
|--------------------------------------|------------------------------|--------------------------------------|----------------------------------------------|
| <b>Cost</b>                          | 500 naira                    | 1000 naira                           |                                              |
| <b>Location of test</b>              | Private hospital             | Pharmacy or Chemist                  |                                              |
| <b>Type of test</b>                  | Swab from mouth              | Blood from finger-prick              | I would not test for HIV using option 1 or 2 |
| <b>Person who tests you</b>          | Trained Healthcare volunteer | Nurse                                |                                              |
| <b>Availability of HIV medicine</b>  | Go to a different location   | At the location where you got tested |                                              |
| <b>Your choice (Please tick one)</b> | <input type="checkbox"/>     | <input type="checkbox"/>             | <input type="checkbox"/>                     |

#### Choice 2

|                                      | Option 1                      | Option 2                             | Option 3                                     |
|--------------------------------------|-------------------------------|--------------------------------------|----------------------------------------------|
| <b>Cost</b>                          | 1000 naira                    | Free                                 |                                              |
| <b>Location of test</b>              | Public or government hospital | Home i.e. self-testing               | I would not test for HIV using option 1 or 2 |
| <b>Type of test</b>                  | Blood from finger-prick       | Blood test from arm                  |                                              |
| <b>Person who tests you</b>          | Nurse                         | Doctor                               |                                              |
| <b>Availability of HIV medicine</b>  | Go to a different location    | At the location where you got tested |                                              |
| <b>Your choice (Please tick one)</b> | <input type="checkbox"/>      | <input type="checkbox"/>             | <input type="checkbox"/>                     |

| Option 1 | Option 2 | Option 3 |
|----------|----------|----------|
|----------|----------|----------|

**Choice 3**

|                                      | Option 1                   | Option 2                             | Option 3                                     |
|--------------------------------------|----------------------------|--------------------------------------|----------------------------------------------|
| <b>Cost</b>                          | 2000 naira                 | 1000 naira                           |                                              |
| <b>Location of test</b>              | Non-profit organizations   | Public/government hospital           |                                              |
| <b>Type of test</b>                  | Blood test from arm        | Swab from mouth                      | I would not test for HIV using option 1 or 2 |
| <b>Person who tests you</b>          | Doctor                     | Trained Healthcare volunteer         |                                              |
| <b>Availability of HIV medicine</b>  | Go to a different location | At the location where you got tested |                                              |
| <b>Your choice (Please tick one)</b> | <input type="checkbox"/>   | <input type="checkbox"/>             | <input type="checkbox"/>                     |

**Choice 4**

|                                      | Option 1                             | Option 2                   | Option 3                                     |
|--------------------------------------|--------------------------------------|----------------------------|----------------------------------------------|
| <b>Cost</b>                          | Free                                 | 1000 naira                 |                                              |
| <b>Location of test</b>              | Pharmacy or Chemist                  | Awareness Events           |                                              |
| <b>Type of test</b>                  | Swab from mouth                      | Blood test from arm        | I would not test for HIV using option 1 or 2 |
| <b>Person who tests you</b>          | Yourself                             | Doctor                     |                                              |
| <b>Availability of HIV medicine</b>  | At the location where you got tested | Go to a different location |                                              |
| <b>Your choice (Please tick one)</b> | <input type="checkbox"/>             | <input type="checkbox"/>   | <input type="checkbox"/>                     |

**Choice 5**

|                         | Option 1                 | Option 2  | Option 3                                     |
|-------------------------|--------------------------|-----------|----------------------------------------------|
| <b>Cost</b>             | 2000 naira               | 500 naira | I would not test for HIV using option 1 or 2 |
| <b>Location of test</b> | Community health centres |           |                                              |

|                                      | Option 1                             | Option 2                                    | Option 3 |
|--------------------------------------|--------------------------------------|---------------------------------------------|----------|
| <b>Type of test</b>                  | Blood from finger-prick              | Sexual Health Clinic<br>Blood test from arm |          |
| <b>Person who tests you</b>          | Yourself                             | Nurse                                       |          |
| <b>Availability of HIV medicine</b>  | At the location where you got tested | Go to a different location                  |          |
| <b>Your choice (Please tick one)</b> | •                                    | •                                           | •        |

### Choice 6

|                                      | Option 1                             | Option 2                   | Option 3                                     |
|--------------------------------------|--------------------------------------|----------------------------|----------------------------------------------|
| <b>Cost</b>                          | 500 naira                            | 1000 naira                 |                                              |
| <b>Location of test</b>              | Non-profit organizations             | Home i.e. self-testing     |                                              |
| <b>Type of test</b>                  | Blood from finger-prick              | Swab from mouth            | I would not test for HIV using option 1 or 2 |
| <b>Person who tests you</b>          | Trained Healthcare volunteer         | Yourself                   |                                              |
| <b>Availability of HIV medicine</b>  | At the location where you got tested | Go to a different location |                                              |
| <b>Your choice (Please tick one)</b> | •                                    | •                          | •                                            |

### Choice 7

|                             | Option 1         | Option 2                     | Option 3                                     |
|-----------------------------|------------------|------------------------------|----------------------------------------------|
| <b>Cost</b>                 | 500 naira        | 2000 naira                   |                                              |
| <b>Location of test</b>     | Awareness Events | Private Hospital             | I would not test for HIV using option 1 or 2 |
| <b>Type of test</b>         | Swab from mouth  | Blood from finger-prick      |                                              |
| <b>Person who tests you</b> | Nurse            | Trained Healthcare volunteer |                                              |

|                                      | Option 1                             | Option 2                   | Option 3 |
|--------------------------------------|--------------------------------------|----------------------------|----------|
| <b>Availability of HIV medicine</b>  | At the location where you got tested | Go to a different location |          |
| <b>Your choice (Please tick one)</b> | •                                    | •                          | •        |

### Choice 8

|                                      | Option 1                             | Option 2                   | Option 3                                     |
|--------------------------------------|--------------------------------------|----------------------------|----------------------------------------------|
| <b>Cost</b>                          | 2000 naira                           | 500 naira                  |                                              |
| <b>Location of test</b>              | Public/government hospital           | Private Hospital           |                                              |
| <b>Type of test</b>                  | Blood from finger-prick              | Swab from mouth            | I would not test for HIV using option 1 or 2 |
| <b>Person who tests you</b>          | Doctor                               | Yourself                   |                                              |
| <b>Availability of HIV medicine</b>  | At the location where you got tested | Go to a different location |                                              |
| <b>Your choice (Please tick one)</b> | •                                    | •                          | •                                            |

### Choice 9

|                                      | Option 1                     | Option 2                             | Option 3                                     |
|--------------------------------------|------------------------------|--------------------------------------|----------------------------------------------|
| <b>Cost</b>                          | Free                         | 1000 naira                           |                                              |
| <b>Location of test</b>              | Pharmacy or Chemist          | Non-profit organizations             |                                              |
| <b>Type of test</b>                  | Blood test from arm          | Swab from mouth                      | I would not test for HIV using option 1 or 2 |
| <b>Person who tests you</b>          | Trained Healthcare volunteer | Yourself                             |                                              |
| <b>Availability of HIV medicine</b>  | Go to a different location   | At the location where you got tested |                                              |
| <b>Your choice (Please tick one)</b> | •                            | •                                    | •                                            |

### Choice 10

|             | Option 1  | Option 2   | Option 3 |
|-------------|-----------|------------|----------|
| <b>Cost</b> | 500 naira | 2000 naira |          |

|                                      | Option 1                   | Option 2                             | Option 3                                     |
|--------------------------------------|----------------------------|--------------------------------------|----------------------------------------------|
| <b>Location of test</b>              | Pharmacy or Chemist        | Sexual Health Clinic                 |                                              |
| <b>Type of test</b>                  | Blood test from arm        | Swab from mouth                      |                                              |
| <b>Person who tests you</b>          | Yourself                   | Trained Healthcare volunteer         | I would not test for HIV using option 1 or 2 |
| <b>Availability of HIV medicine</b>  | Go to a different location | At the location where you got tested |                                              |
| <b>Your choice (Please tick one)</b> | •                          | •                                    | •                                            |

**Choice 11**

|                                      | Option 1                   | Option 2                             | Option 3                                     |
|--------------------------------------|----------------------------|--------------------------------------|----------------------------------------------|
| <b>Cost</b>                          | 1000 naira                 | 500 naira                            |                                              |
| <b>Location of test</b>              | Sexual Health Clinic       | Public/government hospital           |                                              |
| <b>Type of test</b>                  | Blood from finger-prick    | Blood test from arm                  | I would not test for HIV using option 1 or 2 |
| <b>Person who tests you</b>          | Nurse                      | Doctor                               |                                              |
| <b>Availability of HIV medicine</b>  | Go to a different location | At the location where you got tested |                                              |
| <b>Your choice (Please tick one)</b> | <input type="checkbox"/>   | <input type="checkbox"/>             | <input type="checkbox"/>                     |

**Choice 12**

|                                      | Option 1                             | Option 2                   | Option 3                                     |
|--------------------------------------|--------------------------------------|----------------------------|----------------------------------------------|
| <b>Cost</b>                          | 500 naira                            | Free                       |                                              |
| <b>Location of test</b>              | Sexual Health Clinic                 | Non-profit organizations   |                                              |
| <b>Type of test</b>                  | Blood from finger-prick              | Blood test from arm        | I would not test for HIV using option 1 or 2 |
| <b>Person who tests you</b>          | Doctor                               | Nurse                      |                                              |
| <b>Availability of HIV medicine</b>  | At the location where you got tested | Go to a different location |                                              |
| <b>Your choice (Please tick one)</b> | <input type="checkbox"/>             | <input type="checkbox"/>   | <input type="checkbox"/>                     |

## **DCE 2 What is your ideal HIV self-test kit**

As a Nigerian youth, we would like to know YOUR preferences when it comes to HIV testing. You will now be presented with 12 different set of options for you to choose from that are related to HIV testing. It is important for you to answer all the questions as different versions of your options will be presented. Please consider all characteristics for each choice before you choose. Your choices matter and will help us to provide the right program for young people in Nigeria.

HIV Self-Testing is a type of HIV testing you can do by yourself. It allows you to collect your own test specimen, perform the test, and interpret the results in private, either alone or with guidance from someone you trust.

We will use the following terms in the scenarios.

|                                                                                             |                                                                                                                                                                                                                                                           |
|---------------------------------------------------------------------------------------------|-----------------------------------------------------------------------------------------------------------------------------------------------------------------------------------------------------------------------------------------------------------|
| <b>Cost</b>                                                                                 | Free (0)<br>500 naira (1)<br>1000 naira (2)<br>2000 naira (3)                                                                                                                                                                                             |
| <b>Quality of test:</b> Whether a test has been approved by a trusted health organization   | Not approved by the World Health Organization (0)<br>Approved by World Health Organization (1)                                                                                                                                                            |
| <b>Type of test:</b> What specimen is needed.                                               | Blood from finger-prick (0)<br>Swab from mouth (1)                                                                                                                                                                                                        |
| <b>Extra items:</b> Additional items in kit together with HIV self-test kit.                | Test for other sexually transmitted infections (syphilis, chlamydia, gonorrhoeae) (0)<br>Pregnancy test, condoms and/or contraceptive pill (1)<br>Information about safe sex, HIV and other sexually transmitted infections (2)<br>Malaria or TB test (3) |
| <b>Support if test positive: If the test is positive:</b> what kind of support is available | Flyer with the list of HIV clinics (0)<br>Online-chat with trained counsellor or youth health worker (1)<br>Same-day in-person consultation with trained counsellor or youth health worker (2)<br>Same-day in-person consultation with doctor (3)         |
| <b>Location to get the test kit:</b> Where you would like to get the kit                    | Private Hospital (0)<br>Online ordering with home delivery (1)<br>Public/government-owned hospital (2)<br>Pharmacy or Chemist (3)<br>Non-profit/community-based organization (4)<br>School (5)                                                            |

Imagine you want to test for HIV using a “self-test kit”. Given that you are only allowed to choose one of the three options below, which one of the options would you prefer for HIV self-testing?

|             | Option 1   | Option 2 | Option 3 |
|-------------|------------|----------|----------|
| <b>Cost</b> | 1000 Naira | Free     |          |

|                                 |                                    |                                     |                                              |
|---------------------------------|------------------------------------|-------------------------------------|----------------------------------------------|
| <b>Test quality</b>             | Approved by WHO                    | Not Approved by WHO                 | I would not test for HIV using option 1 or 2 |
| <b>Type of test</b>             | Saliva                             | Finger-prick                        |                                              |
| <b>Extra items</b>              | Test for TB/Malaria                | Information about safe sex          |                                              |
| <b>Support if test positive</b> | Flyer with the list of HIV clinics | Online-chat with trained counsellor |                                              |

F1) Was the number of scenarios

- Too many
- Just right
- Too few

F2) Overall, how easy was this survey to answer?

- Very easy
- Easy
- Neither easy or hard
- Hard
- Very hard

D1) Have you ever had sex (including oral sex) in your lifetime?

- Yes
- No

D2) Do you consider yourself to be:

- Straight/heterosexual
- Gay/homosexual
- Other identity, please specify:

D3) In the last 6 months, how many different men have you had sex with?

- None
- Number of men:

A 'regular' partner is defined as a stable partner, your main partner, your main boyfriend or main chick. If you have more than one regular male partner, answer the next question in relation to your **MAIN** or **PRIMARY** regular partner. If you cannot choose a main or primary partner, then consider one regular partner you have been with the longest period of time.

D4) In the last 6 months, how many **REGULAR MALE** partner(s) have you had sex with?

- None
- Number of regular partners:

D5) In the last 6 months, how often did you use condoms for sex with your **REGULAR MALE** partner(s)?

- Always
- Often
- Occasionally
- Never



D6) What was the result of your **REGULAR MALE** partner's last HIV test?

- Positive
- Negative
- I don't know
- He has not tested

D7) Is he on treatment for HIV?

- Yes
- No
- I don't know

A casual partner is defined as having sex with someone that you are not dating or going out with.

D8) In the last 6 months, how many **CASUAL MALE** partner(s) have you had sex with?

- None
- Number of casual partners:

D9) In the last 6 months, how often did you use condoms for sex with your **CASUAL MALE** partner(s)?

- Always
- Often
- Occasionally
- Never

D10) In the last 6 months, how many different women have you had sex with?

- None
- Number of women:

A 'regular' partner is defined as a stable partner, your main partner, your main girlfriend or main chick. If you have more than one regular female partner, answer the next question in relation to your **MAIN** or **PRIMARY** regular partner. If you cannot choose a main or primary partner, then consider one regular partner you have been with the longest period of time.

D11) In the last 6 months, how many **REGULAR FEMALE** partner(s) have you had sex with?

- None
- Number of regular partner(s):

D12) In the last 6 months, how often did you use condoms for sex with your **REGULAR FEMALE** partner(s)?

- Always
- Often
- Occasionally
- Never

D13) What was the result of your **REGULAR FEMALE** partner's last HIV test?

- Positive
- Negative

- I don't know
- She has not tested

D14) Is she on treatment for HIV?

- Yes
- No
- I don't know

A casual partner is defined as having sex with someone that you are not dating or going out with.

D15) In the last 6 months, how many **CASUAL FEMALE** partner(s) have you had sex with?

- None
- Number of casual partners:

D16) In the last 6 months, how often did you use condoms for sex with your **CASUAL FEMALE** partner(s)?

- Always
- Often
- Occasionally
- Never

D17) In the last 6 months, how often have you had group sex (sex involving at least two other people at the same time)?

- Every week
- Monthly
- A few times, but no more than 3-5 times
- Once
- Never
- Yes but more than 6 months ago

D18) Have you ever paid (with money or gifts) a man or woman to have sex?

- A man
- A woman
- Both
- Neither

D19) Have you ever received money or gifts to have sex with a man or woman?

- A man
- A woman
- Both
- Neither

E1) Have you ever been tested for HIV?

- Yes
- No

E2) When did you have your last HIV test?

- Specify month and year
- I have never tested for HIV

E3) In the past 12 months, how many times did you get an HIV test?

- Specify number

E4) Where do you normally go for your HIV test?

- Private hospital
- Public/government hospital
- Community health centres
- Non-profit organizations
- Sexual Health Clinic
- Awareness Events
- Pharmacy
- Chemist
- Self-testing

E5) Do you normally have to pay for your HIV test?

- No
- Yes. How much on average?

E6) On average, how many days does it usually take for you to receive your HIV results?

- Same day
- 2-3 days
- 4-7 days
- More than a week

E7) How likely do you think you could be infected with HIV?

- Very unlikely
- Unlikely
- Neither likely or unlikely
- Likely
- Very likely

E8) Do you take anti-HIV medication regularly to protect yourself from HIV i.e. pre-exposure prophylaxis (PrEP)?

- I have never heard of PrEP
- No
- Yes

F1) Have you heard of any of these sexually transmitted infections? (check all that apply)

- Gonorrhoeae
- Syphilis
- Chlamydia
- Hepatitis B

F2) When did you last have your syphilis test?

- Specify month and year
- I have never tested for syphilis

F2) When did you last have your gonorrhoeae test?

- Specify month and year

- I have never tested for gonorrhoeae

F3) When did you last have your chlamydia test?

- Specify month and year
- I have never tested for chlamydia

F4) When did you last have your Hepatitis B test?

- Specify month and year
- I have never tested for Hepatitis B

G1) Have you ever advised someone to get tested for HIV?

- I have never advised someone to get tested.
- Regular sexual partner (stable partner, main partner, main chick)
- Casual sexual partner (sex with someone you are not dating or going out with)
- Friend
- Family member
- Other, please specify:

HIV Self-Testing is a type of HIV testing you can do by yourself. It allows you to collect your own test specimen, perform the test, and interpret the results in private, either alone or with guidance from someone you trust

G2) Before today, have you ever heard of HIV Self-testing?

- Yes
- No

G3) If free HIV self-test kits were available, would you:

- Take only one kit and use it for yourself
- Take only one kit and use it on my partner
- Take only two kits and use them on myself and my partner
- Take a few kits and give it to others to use.

G4) Who would you give the other kits to?

- Regular sexual partner
- Casual sexual partner
- Friend
- Family member
- Other, please specify:

H1) If you have any comments about this survey or anything else, please let us know in the section below.

---

---

---

---

Thank you very much for your participation.
